1    **Molecular phylogeny of wood decay fungi of hardwood and their ability to produce laccase**  
2                                    **that correlates with triphenylmethane dye decolorization**

3

4    **Maduri Piumi Sashikala Mahawaththage Dona<sup>1</sup>, Anushi Suwanethya Deraniyagala<sup>1</sup>,**  
5    **Priyanga Wijesinghe<sup>2</sup>, Renuka Nilmini Attanayake<sup>1\*</sup>**

6    **<sup>1</sup>Department of Botany, University of Kelaniya, Sri Lanka <sup>2</sup> Department of Botany,**  
7    **University of Peradeniya, Sri Lanka.**

8

9

10

11    **\* Corresponding author**

12    **E mail: [renuka@kln.ac.lk](mailto:renuka@kln.ac.lk)**

13

14    **Author Contributions:**

15    MPSMD: Conducted wet lab work and manuscript writing

16    ASD: Conducted wet lab work and manuscript writing

17    PW: Design experiments and manuscript writing

18    RNA: Conceptualized the idea, secured finding, design experiments and manuscript writing.

19

## 20 **Abstract**

21 Though Sri Lanka belongs to one of the 34 biodiversity hotspots of the world, its microflora  
22 specially fungi are not well studied and underrepresented in the global literature. Here we report  
23 the fungal species diversity of decaying hardwood of a Sri Lankan dry zone forest for the first  
24 time. Decaying hardwoods were collected from historically important Dimbulagala forest reserve,  
25 Sri Lanka and fungi associated with these woods were isolated. Out of 35 fungal species identified  
26 using morphological and molecular methods, 11 species were first records in Sri Lanka. All the  
27 tested isolates were able to utilize wood as the sole carbon source and produced varying degrees  
28 of laccase. Isolates of *Perenniporia tephropora*, *Coriolopsis caperata*, *Gymnopilus dilepis*,  
29 *Fusarium solani* and *Vanderbylia fraxinea* were among the top six laccase producers. Except  
30 *Fusarium solani*, the rest of the isolates showed more than 70% decolorization of the of  
31 triphenylmethane dye and there was a significant positive correlation between laccase production  
32 and dye decolorization. To the best of our knowledge laccase production and dye decolorization  
33 ability of *Vanderbylia fraxinea* and *Gymnopilus dilepis* have never been reported in the fungal  
34 kingdom before. *Perenniporia tephropora* was isolated from one of the strongest decay resistant  
35 hardwood species, Ebony (*Diospyros ebenum*) also known as dark wood and *V. fraxinea* was  
36 isolated from another medicinally important hardwood Neem (*Azadirachta indica*). Findings of  
37 this study confirms that decaying hardwood of Sri Lanka provide unexploded a unique niche for  
38 discovering fungal species with biotechnological applications such as high laccase producers and  
39 dye decolorizers.

40

41 **Key words: Fungi, Hardwood, Laccase, Dye decolorization, ITS region**

## 42 **Introduction**

43  
44 Fungi are considered to be miniature metabolic factories having versatile secondary metabolites  
45 and enzymes with the potential to be used as work horses in diverse array of biotechnological  
46 applications [1]. Based on the Hawksworth's [2] estimation, there are about 1.5 million fungal  
47 species present on earth, which is considered as the baseline estimation. However, recent  
48 metagenomics studies suggested that actual numbers might be closer to 3.5 to 5.1 million species  
49 or much higher than this [3]. This uncertainty in the numbers is partially due to lack of advanced  
50 molecular based thorough studies in the tropics where incredibly rich diversity has been reported  
51 [4]. Hawksworth [5] also suggested that much of the undescribed fungal species could be present  
52 in the tropics and it is reviewed in Aime and Brearley [4].

53 Sri Lanka, a tropical island in the Indian ocean along with the Western Ghats, belongs to one of  
54 the 34 biodiversity hotspots in the world. Though its plant and animal diversity is well studied  
55 [6,7], microbial studies, especially fungal studies remain in its infancy. Furthermore, biodiversity  
56 hotspot concept of Sri Lanka should not be an exception for microbial diversity including fungi.  
57 However, most of the fungal studies in Sri Lanka have mainly focused on macro-fungi using  
58 morphological characters [8]. Moreover, these studies have mainly concentrated on the wet zone  
59 forests. On the other hand, dry zone forest ecosystems in the country spread over 22 % of area in  
60 Sri Lanka, whereas the total forest cover is about 26.6%. Dimbulagala (7°51'40.5"N  
61 81°07'05.5"E) is an isolated hill covered with dry zone forest and it is rich with strong and  
62 economically important hardwood bearing plant species. This region is contacted with minimum  
63 anthropological activities for many years mainly due to 30-year long civil war in this region and  
64 was the study site of the current study. An unexplored niche, decaying hardwood, of

65 Dimbulagala forest reserve was selected with the aim of describing the species diversity of  
66 hardwood decay fungi for the first time in Sri Lanka.

67 For a healthy forest ecosystem, it is critical to recycle carbon stored in these hardwood and litter.  
68 Among many organisms such as beetles, flies, slime molds, bacteria, slugs and snails, primary  
69 decomposers that recycle carbon are fungi. It is known that wood, specially hardwood is a  
70 challenging substrate to degrade as it has very low nitrogen content (commonly C: N is about  
71 500:1) and the presence of various fungal toxic compounds. Therefore, fungi specially  
72 basidiomycetes have evolved to degrade the hardwood structure consisted of cellulose,  
73 hemicellulose and the strongest natural polymer, lignin. They secrete major lignin modifying  
74 enzyme families such as lignin peroxidase, manganese peroxidase, versatile peroxidase and  
75 laccase [9]. Among them, fungal laccases have attracted the attention of scientific community due  
76 to its high redox potential and versatile catalytic properties compared to the laccases from other  
77 sources such as plants and bacteria [10]. Sri Lankan dry zone forests, including Dimbulagala  
78 forest reserve are rich in hardwood bearing plant species such as *Diospyros ebenum*, *Manilkara*  
79 *hexandra*, *Vitex pinnata*, *Diospyros chaetocarpa*, *Terminalia bellirica*, *Chloroxylon swietenia* and  
80 *Berrya cordifolia* [11–13]. These plant species produce hardwood with high economic value and  
81 are resistant to degradation. However, mycelial mats and mushrooms were often observed in  
82 decaying hardwoods in these areas indicating the involvement of fungal for the decay process. If  
83 that is the case, fungal species found in association with these decaying hardwood will be able to  
84 utilize wood as the sole carbon source. Therefore, the second objective was to assess the ability of  
85 the fungal isolates to grow on wood dust media. It was hypothesized that fungal species capable  
86 of growing on such hardwood have the ability to produce high amounts of laccases.

87 Fungal laccases have been identified not only as cell wall degraders, but also as strong oxidizers  
88 with the ability to oxidize di- and polyphenols, aromatic amines, and detoxify environmental  
89 effluents of food, paper, pulp and textile dyes [14,15]. Among these abilities of laccase, industrial  
90 dye decolorization has been the subject of many studies [16,17] and laccases are often considered as  
91 a “Green Tool” in biotechnology [18]. Basidiomycetes have often found to be high laccase  
92 producers as well as dye decolorizers. It was also intended to determine whether the isolates of the  
93 current study are capable of decolorizing an industrial dye, triphenylmethane with the hope of  
94 identifying novel dye decolorizers.

95 Out of tested 43 fungal isolates that could utilize wood as the sole carbon source, 11 were first  
96 records of Sri Lanka. Out of them two species were first time records as laccase producers and  
97 triphenyl methane dye decolorizers. There was a strong positive correlation between laccase  
98 production and dye decolorization.

## 99 **Materials and Methods:**

### 100 **Sample collection**

101  
102 Sampling site was Dimbulagala historical forest reserve in Polonnaruwa district, Sri Lanka.  
103 Research permits were obtained from the authorities and samples were collected and handled  
104 ethically without harming living trees. Thirty-five decayed hard wood pieces of 5-6 cm length  
105 showing brown and white rot symptoms were collected randomly along the trail to the top of the  
106 hill (7°51'34.1"N 81°06'53.2"E to 7°51'42.8"N 81°07'09.0"E). Samples were collected into clean  
107 zip lock plastic bags and transported to the laboratory at University of Kelaniya (Fig. 1). Host of  
108 the decaying wood was recorded whenever possible. However, in most of the cases it was not

109 possible to clearly identify the plant species that decayed wood pieces belonged to. Samples were  
110 air dried for two days and stored in a refrigerator until further use.

111

112 **Fig 1: Samples showing decaying hardwood (A) with mycelial growth and (B) white rot**  
113 **symptom.**

### 114 **Isolation of fungi into culture media**

115

116 Decaying wood pieces (approximately 1 × 1 cm) were surface sterilized with 5% Clorox for 2  
117 minutes followed by three serial washings with sterilized distilled water. Washed materials were  
118 blot dried using sterilized filter papers. Samples were trimmed from the edges and cut into  
119 approximately four pieces, placed on semi selective PDA media supplemented with streptomycin  
120 (100 µg/mL). Another isolation step was carried on semi selective medium slightly modified from  
121 Baumgartener et al. [19] by supplementing PDA with streptomycin (100 µg/mL) and fungicide  
122 carbendazim (4 µg/mL) to inhibit fast growing ascomycetes. Plates were incubated at room  
123 temperature for one week. All the fungal colonies originated from the wood pieces were sub  
124 cultured and pure cultures were obtained by hyphal tip isolation method. Pure cultures of 55 fungal  
125 isolates were obtained and vouchered both in sterile water and at -20 °C in Whatman number 1  
126 filter papers at the Department of Botany, University of Kelaniya, Sri Lanka and assigned strain  
127 IDs.

### 128 **Ability of isolated fungi to utilize wood as the sole carbon source**

129 Ability of isolated fungi to utilize wood as the sole carbon (C) source was tested according to Swe  
130 [20]. During this assay most of the isolates those with morphological characters similar to

131 *Trichoderma* spp. were excluded and therefore, out of 55, 43 isolates were used in further studies.  
132 First, saw dust of *Mangifera indica* was passed through 2 mm sieve. Wood agar plates were  
133 prepared with saw dust (2% w/v), stock salt solution (5 % v/v), Hutner's trace elements (0.02 %  
134 v/v), with and without supplementing glucose (0.05% w/v) and agar (1.5 % w/v) followed by Swe  
135 [20]. Both wood agar plates with and without glucose were inoculated with 5 mm-diameter  
136 mycelial disc obtained from actively growing edge of 7-day old culture from each isolate. Plates  
137 were incubated at the room temperature ( $28 \pm 2$  °C) for three days. Colony diameters were  
138 measured in two-dimension perpendicular to each other. Experiment was repeated once.

139

## 140 **Morphological and molecular identification of fungi**

141

142 All the isolates were grown on PDA plates and used for morphological observation. Colony color,  
143 appearance and mycelial color, spores and sporulating structures when available of all the isolates  
144 were observed under phase contrast microscope (x 400 magnification) (Olympus CX41 model,  
145 Tokyo, Japan).

146 Out of all the isolates, 35 isolates that showed variable morphological features indicating  
147 putatively different species were selected for molecular level identification. Three mycelial plugs  
148 from actively growing colonies were inoculated into 50 mL Potato Dextrose Broth (PDB)  
149 supplemented with streptomycin (100 µg/mL). Flasks were incubated in a rotary shaker (Stuart-  
150 SSL1, UK) at 120 rpm at room temperature for 5-7 days. Mycelia were separated, washed with  
151 500 µL of sterilized distilled water and squeeze dried with sterilized filter papers. DNA was  
152 extracted following modified method of Cenis [21]. DNA Pellet was re-suspended in TE buffer  
153 (50-100 µL) and stored at -20°C until further analysis. Quality of extracted DNA was visually

154 observed on 0.8% agarose containing 0.5 µg/ml of Ethidium bromide. Polymerase Chain Reaction  
155 (PCR) was performed with universal ITS1 and 4 or 4 and 5 primer pairs [22]. Reaction mixture  
156 consisted of 1x Colorless GoTaq® Flexi Buffer, 2 mM MgCl<sub>2</sub>, 200 µM each dNTP, 0.5 µM  
157 forward and reverse primers, 1.25U of GoTaq® DNA Polymerase (Promega Inc., USA) and <0.5  
158 µg template DNA. PCR reaction was performed in a thermal cycler (Veriti® 96-Well Thermal  
159 Cycler, ABI Biosystems, USA) as published in Maduranga et al.[23]. Nuclease free water was  
160 added as the negative control and PCR products were separated using agarose gel electrophoresis  
161 and visualized under a Gel Documentation System (Quantum ST5, Germany). Pure PCR products  
162 were sequenced following Sanger dideoxy chain termination technology at the Genetech Institute,  
163 Colombo, Sri Lanka. Sequences were manually edited using BioEdit sequence Alignment Editor  
164 (Version7.2.5)[24]. Using Basic Local Alignment Search Tool (BLASTn), nucleotide sequences  
165 were compared with the authentic sequences available in the National Center for Biotechnology  
166 Information (NCBI) database and species were identified. All sequences were deposited in the  
167 GenBank and the accession numbers obtained are shown in Table 1.

## 168 **Molecular phylogenetic analysis**

169 DNA sequences were aligned using a multiple sequence alignment algorithm, Multiple Sequence  
170 Comparison by Log- Expectation (MUSCLE) [25], implemented in MEGA ver. X [26]. Gblocks  
171 0.91b was used to eliminate poorly aligned positions and divergent regions of the alignment [27].  
172 All characters were equally weighted and the gaps were treated as missing data. No out group was  
173 used and tree was unrooted. The evolutionary history was inferred using several phylogenetic tree  
174 construction methods, Maximum Likelihood, maximum parsimony and neighbor-joining,  
175 implemented in MEGA ver. X software. For Maximum Likelihood method, initial tree(s) for the  
176 heuristic search were obtained automatically by applying Neighbor-Join and BioNJ algorithms to



177 a matrix of pair-wise distances estimated using the Maximum Composite Likelihood (MCL)  
178 approach, and then selecting the topology with superior log likelihood value. To test the statistical  
179 support of each branch, one thousand boot strap replications were used as implemented in MEGA  
180 X.

### 181 **Qualitative determination of laccase production by fungal spp.**

182  
183 PDA medium containing guaiacol was prepared by adding guaiacol at 0.01% w/v (G5502, Sigma)  
184 into PDA before autoclaving. Guaiacol PDA plates were inoculated using a mycelial disk (5 mm  
185 diam.) obtained from an actively growing edge of 7 days old culture plates. Triplicates of plates  
186 were incubated at room temperature (30-32 °C) for 5 days and the presence of brick red color  
187 around the mycelia or underside of the plate was observed [20]. Experiment was repeated once.  
188 Isolates that showed consistent red coloration were used for quantitative analysis.

### 189 **Quantitative determination of laccase production by fungal spp.**

190  
191 Lignocellulose degrading enzyme production was quantitatively determined following [20] for  
192 selected 15 samples based on the qualitative assay. Liquid media consisted of 2 % (w/v) wood dust  
193 of *Mangifera indica*, glucose, salt solution and Hutner's trace elements as described in Swe [20].  
194 Erlenmeyer flasks filled with 150.00 mL of liquid media (with saw dust) were autoclaved at 121°C  
195 for 20 min. and inoculated with 4 mycelial discs (5.00 mm diam.) obtained from the actively  
196 growing edges of 7-day old pure cultures of each fungal isolate. Experiment was conducted in  
197 triplicate for the selected 15 fungal isolates and one isolate continuously produced negative results  
198 was used as the negative control (Isolate IMF5). In addition, media with plain PDA plugs was also  
199 served as a negative control. Flasks were incubated at room temperature (30-32 °C) in a shaker

200 (Stuart-SSL1, UK) (120 rpm) and 1.00 mL of each sample was collected once in the 5<sup>th</sup>, 8<sup>th</sup> and  
201 12<sup>th</sup> day during the incubation period. The collected samples were centrifuged at 5100 rpm for 15  
202 min and the supernatant (here after referred as enzyme extract) was stored at -20°C [20]. Reaction  
203 mixture (5 mL) contained 3.90 mL acetate buffer (10 mM, pH 5.0), 1.00 mL guaiacol (1.76 mM)  
204 and 0.1 mL of the enzyme extract, and incubated at 25°C for 2 hrs. followed by the measuring of  
205 absorbance at 450 nm (Thermo scientific Multiskan GO, Finland). In the blank, enzyme extract  
206 was substituted with the buffer. Enzyme activity is considered to be corresponding with the  
207 increase in absorbance at 450 nm as indicated in Arora and Sandhu [28]. One-way Analysis of  
208 Variance (ANOVA) was carried out using Minitab 17 software (Minitab Inc., USA) to determine  
209 if there is a significant difference among isolates for the laccase production. Experiment was  
210 repeated once.

## 211 **Triphenylmethane dye decolorization capacity of laccase producing** 212 **fungi**

213  
214 Conical flasks containing 25 mL of sterilized medium containing glucose (10 g/L), KH<sub>2</sub>PO<sub>4</sub> (1  
215 g/L), MgSO<sub>4</sub> (0.5 g/L), CaCl<sub>2</sub> (0.14 g/L), yeast extract (1 g/L), thiamine (0.0025 g/L) and  
216 bromophenol blue (0.05%) were inoculated with 3 mycelial discs (5.00 mm) of 7-day old actively  
217 growing colonies [29]. Flasks were incubated at room temperature for 21 days in the shaker  
218 (Stuart-SSL1, UK) at 210 rpm. Two milliliters from each flask was obtained in 8<sup>th</sup> and 21<sup>st</sup> days  
219 after incubation and centrifuged at 12,000 rpm for 5 minutes to obtain cell free supernatant.  
220 Absorbance of each sample was measured at 590 nm (Thermo Scientific Orion aquamate 8000  
221 UV-VIS spectrophotometer, USA) following Nidadavolu *et al.* [30]. Previously used IMF5 was  
222 used as the negative control. In addition, media with plain PDA plugs was also served as a negative  
223 control. The decolorization efficiency was determined using the following equation [31],

224

$$225 \quad \% \text{ decolorization} = \left[ \frac{A \text{ initial} - A \text{ final}}{A \text{ initial}} \right] * 100\%$$

226

227 where, *A initial* is the absorbance at the beginning and *A final* is the final absorbance.

228 To determine the correlation between laccase production and the dye decolonization abilities,

229 Pearson's correlation was carried out.

230

## 231 **Results:**

### 232 **Isolation of fungi from decaying woods:**

233 When PDA was used as the medium, very often fast growing genera of *Trichoderma* and

234 *Lasiodiplodia* spp. were isolated and therefore, semi selective media amended with both antibiotic

235 and benzimidazole was used to capture other genera as well. All together 55 isolates were obtained

236 and most of the colonies that showed *Trichoderma* like morphology were excluded from the

237 subsequent studies since it is well represented in many scientific literatures.

### 238 **Ability of isolated fungi to utilize wood as the sole C source**

239 None of the fungal isolates showed significant difference ( $p < 0.05$ ) in their colony diameters on

240 glucose amended vs. glucose non amended media. In some instances, though not significant

241 glucose increased the colony diameters (Fig 2). All the tested isolates were able to utilize wood as

242 their carbon source and based on the colony diameters after three days of incubation, 43 isolates

243 were categorized into three categories as fast growers ( $>6.0$  cm diameter), intermediate growers

244 (6.0-3.0 cm) and slow growers (<3.0 cm). Figure 2 shows the variation in colony diameters on  
245 both media for the 43 isolates. Raw data were deposited in Dryad repository  
246 <https://doi.org/10.5061/dryad.g7f4m0j>

247

248

249 **Fig 2. Bar chart showing mean colony diameter (cm) in wood agar (with and without**  
250 **glucose) and names of fungal isolates. Whiskers indicate one SE.**

251

## 252 **Identification of fungi**

253 Since most of the fungal isolates were sterile (Fig 3) it was intended to use molecular  
254 identification method.

255

256 **Fig 3. Colony morphology (10-day old culture in the left) and microscopic features of the**  
257 **isolates in the right of the isolates (A) KH2 and (B) DDW10A. Scale bar shows 50  $\mu\text{m}$  and 20**  
258  **$\mu\text{m}$  respectively.**

259 DNA extraction was successful for all the fungal isolates. When ITS1/4 or ITS4/5 primer  
260 combinations were used, most of the isolates produced single clear bands. Table 1 shows BLASTn  
261 results of each isolate along with the published/vouchered species that showed the highest  
262 sequence similarity. After removing most of the fungal cultures with morphologically similar  
263 characteristics on PDA, 35 were selected for molecular identification to avoid repetition.

264

265

266

267 **Table 1: Isolate name, GenBank accession, species name and the GenBank accession**  
268 **number, which showed the highest sequence homology and the percent similarity.**

| <b>Number</b> | <b>Isolate name/voucher name</b> | <b>GenBank accession</b> | <b>Species (most similar GenBank accession)</b> | <b>Percent similarity</b> |
|---------------|----------------------------------|--------------------------|-------------------------------------------------|---------------------------|
| 1             | F1/DYF                           | MF164877                 | <i>Lentinus squarrosulus</i> (KT273373.1)       | 99%                       |
| 2             | F5/DBF                           | MF185103                 | <i>Daldinia eschscholtzii</i> (KY432354.1)      | 100%                      |
| 3             | F10/DHF5B                        | MF185104                 | <i>Fusarium decemcellulare</i> (MH857667.1)     | 99%                       |
| 4             | F9/DDW10A                        | MF185105                 | <i>Perenniporia tephropora</i> (JN048763.1)     | 99%                       |
| 5             | F4/DPW                           | MF185106                 | <i>Schizophyllum commune</i> (MF476007.1)       | 99%                       |
| 6             | F2/DSO                           | MF185107                 | <i>Hypoxylon</i> sp. (KC968924.1)               | 95%                       |
| 7             | F6/DZF4A                         | MF195026                 | <i>Coprinellus aureoconulatus</i> (MH379152.1)  | 99%                       |
| 8             | F7/IMF1A                         | MF195027                 | <i>Phanerochaete</i> sp. (HQ589222.1)           | 94%                       |
| 9             | F8/TW2AWP                        | MF195028                 | <i>Gymnopilus dilepis</i> (KT368680.1)          | 99%                       |
| 10            | F3/TW5                           | MF195029                 | <i>Scytalidium</i> sp. (AY762623.1)             | 86%                       |
| 11            | F11/DZFK2                        | MF195030                 | <i>Fusarium solani</i> (M277969.1)              | 98%                       |
| 12            | F12/DHF1                         | MF195031                 | <i>Hexagonia</i> sp. (KX900637.1)               | 81%                       |

|    |           |          |                                                       |      |
|----|-----------|----------|-------------------------------------------------------|------|
| 13 | F13/DHF2  | MF289184 | <i>Perenniporia tephropora</i><br>(JN048763.1)        | 98%  |
| 14 | F14/ADW2A | MF289185 | <i>Corioloopsis caperata</i><br>(KR078279.1)          | 99%  |
| 15 | F16/ADW3  | MF289186 | <i>Phanerochaete australis</i><br>(KP135080.1)        | 98%  |
| 16 | ADB2      | MF671942 | <i>Trichoderma harzianum</i><br>(KT852806.1)          | 99%  |
| 17 | ADB4      | MF671943 | <i>Lasiodiplodia crassispora</i><br>(FJ888477.1)      | 98%  |
| 18 | ADB5      | MF671944 | <i>Trichoderma harzianum</i><br>(KT852806.1)          | 99%  |
| 19 | ADB7      | MF671945 | <i>Lasiodiplodia crassispora</i><br>(HM466955.2)      | 99%  |
| 20 | ADW5      | MF671947 | <i>Trichoderma harzianum</i><br>(KF201295.1)          | 99%  |
| 21 | ADW8      | MF671948 | <i>Lasiodiplodia pseudotheobromae</i><br>(EU860391.1) | 98%  |
| 22 | DB8       | MF671949 | <i>Lasiodiplodia crassispora</i><br>(JX464058.1)      | 99%  |
| 23 | DW9       | MF671950 | <i>Trichoderma erinaceus</i><br>(MG372128.1)          | 99%  |
| 24 | DW10      | MF671951 | <i>Lasiodiplodia pseudotheobromae</i><br>(MG870583.1) | 98%  |
| 25 | DW11      | MF671952 | <i>Phialophora alba</i> (HM116755.1)                  | 99%  |
| 26 | ADB2A     | MF671989 | <i>Trichoderma harzianum</i><br>(KT852833.1)          | 100% |
| 27 | ADB3      | MF671990 | <i>Xylogone sphaerospora</i><br>(GQ272626.1)          | 98%  |
| 28 | DDW2      | MF671991 | <i>Neoscytalidium hyalinum</i><br>(MH861121.1)        | 99%  |
| 29 | DDW5      | MF671992 | <i>Pleurostoma richardsiae</i><br>(MH859458.1)        | 99%  |
| 30 | DDW6      | MF671993 | <i>Trichoderma longibrachiatum</i><br>(KJ174214.1)    | 99%  |

|    |        |            |                                                  |     |
|----|--------|------------|--------------------------------------------------|-----|
| 31 | DDW10B | MF671994   | <i>Paecilomyces formosus</i><br>(MH859718.1)     | 99% |
| 32 | DDW10C | MF671995   | <i>Hypoxylon fragiforme</i><br>(KJ826511.1)      | 98% |
| 33 | DW7    | MF671996   | <i>Lasiodiplodia crassispora</i><br>(JX464058.1) | 99% |
| 34 | KH2    | MG890271   | <i>Vanderbylia fraxinea</i><br>(KX081102.1)      | 99% |
| 35 | ADW1   | MF671946.2 | <i>Trichoderma harzianum</i><br>(KT852833.1)     | 99% |

269

## 270 **Molecular phylogenetic analysis**

271 The evolutionary history was inferred by using the Maximum Likelihood method and Tamura-  
272 Nei model [26]. Unrooted the tree with the highest log likelihood (-9113.58) is shown in the Fig  
273 3. Initial tree(s) for the heuristic search were obtained automatically by applying Neighbor-Join  
274 and BioNJ algorithms to a matrix of pairwise distances estimated using the Maximum Composite  
275 Likelihood (MCL) approach, and then selecting the topology with superior log likelihood value.  
276 In 35 isolates, there were a total of 654 positions in the final dataset. The percentage of trees in  
277 which the associated taxa clustered together is shown next to the branches for maximum  
278 likelihood, Maximum parsimony and neighbor joining methods respectively. Colony diameter  
279 data were also included and represented by +, ++ or +++ to indicate slow medium and fast  
280 growth respectively.

281

282 **Fig 4. Maximum likelihood tree (unrooted) with the highest log likelihood showing**  
283 **phylogenetic placement of 35 wood decay fungi isolated from Sri Lanka. Bootstrap support**  
284 **is shown above each branch in three different analyses, Maximum Likelihood, Maximum**

285 **Parsimony and Neighbor Joining respectively. Amount of laccase production in quantitative**  
286 **assay is depicted in red colored boxes in each taxon (darker the color higher the laccase**  
287 **production). Colony diameter is indicated in +, ++ and +++ to represent slow medium and**  
288 **fast growers respectively. Growth diameter was not determined for the isolates with empty**  
289 **cells.**

290

### 291 **Qualitative determination of laccase production by fungal spp.**

292 Out of 43, only 15 isolates were observed to be consistently producing laccase as indicated by the  
293 production of dark red/brown color development in the PDA medium amended with guaiacol in  
294 several repeated experiments. Evaluated fungal strains produced varying levels of color intensities  
295 as well as coloration patterns while negative control remained without any red color development.

### 296 **Quantitative determination of laccase production by fungal spp.**

297 Isolates were significantly different from each other in their mean absorbance values as measured  
298 in 5<sup>th</sup>, 8<sup>th</sup> and 12<sup>th</sup> days indicating significant difference in laccase production ( $p < 0.05$ ) (Table 2).  
299 Both of the isolates of *Perenniporia tephropora*, and the rest of the isolates of *Coriolopsis*  
300 *caperata*, *Gymnopilus dilepis*, *Fusarium solani*, *Vanderbylia fraxinea* and *Scytalidium* sp. were  
301 among the top seven laccase producers in both trials.

302

303

304

305

306

307

308

309

310

311



312  
313  
314  
315  
316  
317

**Table 2: Varying amounts of laccase production as indicated by the absorbance values and percentage dye decolorization ( $\pm$  SD) of the isolates. Isolates that do not share the same letter**

| Isolate | Species name                       | Laccase production               |                                  |                                  | Percentage decolorization of bromophenol blue |                                |
|---------|------------------------------------|----------------------------------|----------------------------------|----------------------------------|-----------------------------------------------|--------------------------------|
|         |                                    | Mean absorbance values $\pm$ SD  |                                  |                                  | Mean % decolorization $\pm$ SD                |                                |
|         |                                    | 5 <sup>th</sup> day              | 8 <sup>th</sup> day              | 12 <sup>th</sup> day             | 8 <sup>th</sup> day                           | 21 <sup>st</sup> day           |
| DDW10A  | <i>Perenniporia tephropora</i>     | 0.158 $\pm$ 0.004 <sup>a</sup>   | 0.168 $\pm$ 0.006 <sup>a</sup>   | 0.166 $\pm$ 0.003 <sup>a</sup>   | 71.173 $\pm$ 0.974 <sup>a</sup>               | 89.29 $\pm$ 0.680 <sup>a</sup> |
| DHF2    | <i>Perenniporia tephropora</i>     | 0.153 $\pm$ 0.006 <sup>a</sup>   | 0.152 $\pm$ 0.008 <sup>a</sup>   | 0.142 $\pm$ 0.009 <sup>b</sup>   | 70.800 $\pm$ 0.230 <sup>a</sup>               | 87.19 $\pm$ 0.506 <sup>b</sup> |
| ADW2A   | <i>Coriolopsis caperata</i>        | 0.144 $\pm$ 0.006 <sup>a,b</sup> | 0.157 $\pm$ 0.004 <sup>a</sup>   | 0.115 $\pm$ 0.008 <sup>c</sup>   | 70.087 $\pm$ 0.172 <sup>a</sup>               | 84.63 $\pm$ 0.569 <sup>c</sup> |
| TW2AWP  | <i>Gymnopilus dilepis</i>          | 0.128 $\pm$ 0.009 <sup>b,c</sup> | 0.124 $\pm$ 0.004 <sup>b</sup>   | 0.131 $\pm$ 0.006 <sup>b,c</sup> | 54.753 $\pm$ 0.396 <sup>b</sup>               | 74.18 $\pm$ 0.742 <sup>c</sup> |
| DZFK2   | <i>Fusarium solani</i>             | 0.122 $\pm$ 0.002 <sup>c</sup>   | 0.122 $\pm$ 0.005 <sup>b</sup>   | 0.121 $\pm$ 0.002 <sup>c</sup>   | 14.923 $\pm$ 1.236 <sup>f</sup>               | 15.11 $\pm$ 0.196 <sup>i</sup> |
| KH2     | <i>Vanderbylia fraxinea</i>        | 0.117 $\pm$ 0.005 <sup>c</sup>   | 0.124 $\pm$ 0.001 <sup>b</sup>   | 0.139 $\pm$ 0.004 <sup>b</sup>   | 52.047 $\pm$ 0.365 <sup>c</sup>               | 79.07 $\pm$ 0.396 <sup>d</sup> |
| TW5     | <i>Scytalidium</i> sp.             | 0.111 $\pm$ 0.010 <sup>c,d</sup> | 0.133 $\pm$ 0.006 <sup>b</sup>   | 0.119 $\pm$ 0.008 <sup>c</sup>   | 11.427 $\pm$ 0.396 <sup>g</sup>               | 18.45 $\pm$ 0.879 <sup>h</sup> |
| DLP*    | n/a                                | 0.098 $\pm$ 0.006 <sup>d,e</sup> | 0.085 $\pm$ 0.003 <sup>c</sup>   | 0.088 $\pm$ 0.003 <sup>d</sup>   | 39.683 $\pm$ 0.455 <sup>d</sup>               | 40.17 $\pm$ 0.172 <sup>f</sup> |
| ADW3    | <i>Phanerochaete australis</i>     | 0.083 $\pm$ 0.007 <sup>e,f</sup> | 0.119 $\pm$ 0.008 <sup>b</sup>   | 0.115 $\pm$ 0.005 <sup>c</sup>   | 11.463 $\pm$ 0.800 <sup>g</sup>               | 24.61 $\pm$ 0.287 <sup>g</sup> |
| DHF5B   | <i>Fusarium decemcellulare</i>     | 0.081 $\pm$ 0.002 <sup>f</sup>   | 0.079 $\pm$ 0.007 <sup>c</sup>   | 0.066 $\pm$ 0.005 <sup>e</sup>   | n/a                                           | n/a                            |
| DPW     | <i>Schizophyllum commune</i>       | 0.069 $\pm$ 0.003 <sup>f</sup>   | 0.074 $\pm$ 0.001 <sup>c,d</sup> | 0.089 $\pm$ 0.004 <sup>d</sup>   | 12.627 $\pm$ 0.597 <sup>g</sup>               | 12.03 $\pm$ 0.919 <sup>i</sup> |
| DZF4A   | <i>Coprinellus aureogranulatus</i> | 0.050 $\pm$ 0.004 <sup>g</sup>   | 0.059 $\pm$ 0.006 <sup>d,e</sup> | 0.086 $\pm$ 0.006 <sup>d</sup>   | 17.437 $\pm$ 0.469 <sup>e</sup>               | 18.53 $\pm$ 0.168 <sup>h</sup> |
| IMF1A   | <i>Phanerochaete</i> sp.           | 0.047 $\pm$ 0.005 <sup>g</sup>   | 0.059 $\pm$ 0.007 <sup>d,e</sup> | 0.039 $\pm$ 0.004 <sup>f</sup>   | n/a                                           | n/a                            |
| DBF     | <i>Daldinia eschscholtzii</i>      | 0.045 $\pm$ 0.007 <sup>g</sup>   | 0.046 $\pm$ 0.003 <sup>c</sup>   | 0.044 $\pm$ 0.001 <sup>f</sup>   | n/a                                           | n/a                            |

318 were significantly different from each other ( $p < 0.05$ ).

319

320

321

322 \* repeated attempts of DNA barcoding was unsuccessful n/a- not determined

323

|        |                         |                     |                     |                     |                          |                     |
|--------|-------------------------|---------------------|---------------------|---------------------|--------------------------|---------------------|
| IMF10* | n/a                     | $0.040 \pm 0.002^g$ | $0.116 \pm 0.003^c$ | $0.112 \pm 0.005^d$ | $13.227 \pm 0.902^{f,g}$ | $19.32 \pm 0.363^h$ |
| IMF5*  | negative control<br>n/a | $0.001 \pm 0.005^h$ | $0.004 \pm 0.007^f$ | $0.003 \pm 0.003^g$ | $01.100 \pm 0.676^h$     | $0.607 \pm 0.395^k$ |

## 325 **Triphenylmethane dye decolorization assay**

326 Fifteen laccase producers were selected for the determination of their ability to decolorize one of  
327 the triphenylmethane dye, bromophenol blue and the results of the quantitative were shown in the  
328 Table 2. Isolates were significantly different for the dye decolorization ability as measured by the  
329 absorbance values ( $p < 0.05$ ). While both *Perenniporia tephropora* species and *Coriolopsis*  
330 *caperata* isolate decolorized more than 70% of the dye by the 8<sup>th</sup> day, *Vanderbylia fraxinea* and  
331 *Gymnopilus dilepis* isolates decolorized the dye by 70% after three weeks. Each treatment in  
332 triplicates showed the decolorization of the dye and no decolorization was observed in negative  
333 controls (Table 2). Qualitative test results were indicative of quantitative results. Other laccase  
334 positive fungal isolates displayed low decolorization efficiency (below 50%). Non-laccase  
335 producer, IMF5, had the least decolorization efficiency (below 10%). According to the Pearson's  
336 correlation analysis, there was a strong and significant correlation ( $R = 0.64$ ,  $P = 0.023$ ) between  
337 the dye decolorization and laccase production abilities as measured in absorbance values.

## 338 **Discussion:**

339 Here we reported the presence of 23 different fungal species present in total of 35 decaying  
340 hardwood samples (each with 1 cm<sup>2</sup>) and out of them, 11 species; *Coprinellus aureogranulatus*,  
341 *Coriolopsis caperata*, *Hypoxylon fragiforme*, *Neoscytalidium hyalinum*, *Perenniporia tephropora*,  
342 *Phanerochaete australis*, *Phialophora alba*, *Pleurostoma richardsiae*, *Paecilomyces formosus*,  
343 *Vanderbylia fraxinea* and *Xylogone sphaerospora*, were the first reports of Sri Lanka. This finding  
344 is important since it highlights that Sri Lankan fungal diversity studies are lagged behind though  
345 it is one of the 34 bio diversity hot spots in the world. Except a single study conducted by  
346 Ediriweera *et al.* [32] where 14 out of 49 fungal fruiting bodies were identified up to the species

347 level from ‘Sigiriya’ forest in the dry zone, our study is the first to use molecular level fungal  
348 species determination on decaying hardwoods in Sri Lanka. It is also important to note that two  
349 isolates, F3/TW5 and F12/DHF1 did not show sufficient sequence homology for any of the  
350 published records in the GenBank and tentatively identified as *Scytalidium* sp. (86%) and  
351 *Hexagonia* sp. (81%) and warrants further studies.

352 It was hypothesized that fungal species capable of degrading hardwoods are also high laccase  
353 producers. Presence of laccase has been determined by the formation of reddish brown color due  
354 to oxidation of guaiacol by laccase in many studies [33,34] and was implemented in the present  
355 study. Among the tested species, *Perenniporia tephropora* produced the highest amount of laccase  
356 and this finding is in line with Younes *et al.* [35]. There was no significant difference between *P.*  
357 *tephropora* and *Coriolopsis caperata* for the laccase production. Other best laccase producers were  
358 *Gymnopilus dilepis*, *Fusarium solani* and *Vanderbylia fraxinea*. Though the mother plant species  
359 of most of the decayed wood pieces were not known, it is interesting to note that *P. tephropora*  
360 and *V. fraxinea* were isolated from decaying woods of two economically and medicinally  
361 important hardwood species, Ebony (*Diospyros ebenum*) and Neem (*Azadirachta indica*)  
362 respectively. *Diospyros ebenum* also known as black wood is native to India and Sri Lanka and  
363 belongs to one of the hardest wood species resistant to withering and fungal infections. Neem is  
364 also known to contain numerous chemical compounds with medicinal importance and also known  
365 as the tree of the 21<sup>st</sup> century by the United Nations. Specially we tested whether these two fungi  
366 can utilize *Diospyros ebenum* wood dust as the sole C source and confirmed to be able to grow on  
367 wood agar palates (observational study only). Fungi isolated from the decaying woods of these  
368 plants were among the top laccase producers supporting our original hypothesis. Since Hori *et al.*  
369 (2017) found that white rot polyporales show greater enzymatic diversity than brown rot

370 polyporales [36] and both these fungal species were isolated from white rot hardwoods, it is worth  
371 conducting a full genomic analysis.

372 We found that the laccase production was positively correlated with triphenylmethane dye  
373 decolorization. Laccase and other ligninase enzyme extract's direct involvement in dye  
374 decolorization has been previously reported [37,38,39]. We also found that *P. tephropora* and *C.*  
375 *caperata* were the strongest bromophenol blue decolorizers similar to previous studies [35,40,41].  
376 However, to the best of our knowledge triphenylmethane dye decolorization ability and laccase  
377 production of *Vanderbylia fraxinea* and *Gymnopilus dilepis* has never been reported in the fungal  
378 kingdom before and we report it for the first time.

379 These findings were of high importance, since it is known that synthetic dyes used in the textile,  
380 paper, leather and cosmetic industries are highly toxic, resistant to light, chemical and microbial  
381 degradation. Among many types of dyes, triphenylmethane dyes are resistant to enzymatic  
382 decolorization and it is time consuming [42]. Laccases require no H<sub>2</sub>O<sub>2</sub> for oxidation reactions  
383 like other oxidases and that makes laccase an important enzyme in bio remediation. In the  
384 phylogenetic analysis, though laccase production is not monophylectic, all the high laccase  
385 producers were clustered together in a single clade of basidiomycetes. Though Ascomycetes have  
386 laccase producing ability, they produce relatively low amounts. It has also been reported that  
387 number of laccase gene copies could vary among species depending on the life history traits [43].

388

389 Finally, this study reported 11 wood decay fungal species in Sri Lanka as first reports highlighting  
390 the importance of a thorough fungal diversity study in Sri Lanka since there is a high potential to  
391 report novel biotechnologically important species. It was also proved that most of the decaying

392 wood associated fungi are indeed can utilize wood as the sole C source. To the best of our  
393 knowledge, laccase production and triphenylmethane dye decolorization ability of *Vanderbylia*  
394 *fraxinea* and *Gymnopilus dilepis* have never been reported in the fungal kingdom before. It was  
395 also found that laccase production was positively correlated with the dye decolorization ability.  
396 Therefore, the selected isolates have very high potential in applying for a greener biotechnology.

## 397 **Acknowledgements**

398 This research was funded by TWAS and ICGEB research grants.

## 399 **References**

- 400 1. Fox EM, Howlett BJ. Secondary metabolism: regulation and role in fungal biology. *Curr*  
401 *Opin Microbiol.* 2008 Dec;11(6):481–7.
- 402 2. Hawksworth DL. The fungal dimension of biodiversity: magnitude, significance, and  
403 conservation. *Mycol Res [Internet]*. 1991;95(6):641–55. Available from:  
404 <http://www.sciencedirect.com/science/article/pii/S0953756209808101>
- 405 3. Blackwell M. The fungi: 1, 2, 3 ... 5.1 million species? *Am J Bot.* 2011 Mar;98(3):426–38.
- 406 4. Aime MC, Brearley FQ. Tropical fungal diversity: closing the gap between species  
407 estimates and species discovery. *Biodivers Conserv [Internet]*. 2012 Aug;21(9):2177–80.  
408 Available from: <https://doi.org/10.1007/s10531-012-0338-7>
- 409 5. Hawksworth D. The tropical fungal biota: census, pertinence, prophylaxis, and prognosis.  
410 *Aspects of tropical mycology. Symposium, Liverpool, 1992.* 1993. 265–293 p.
- 411 6. Gunatilleke Nimal, Pethiyagoda Rohan G. Special issue inside.pdf. 2008;(25):25–61.

- 412 7. Wilkin P, Dassanayake MD, Clayton WD. A Revised Handbook to the Flora of Ceylon.  
413 Volume XIV. Kew Bull. 2007 Nov 27;55(4):1015.
- 414 8. Karunarathna S. Current status of knowledge of Sri Lankan mycota. *Curr Res Environ*  
415 *Appl Mycol.* 2018;2(1):18–29.
- 416 9. Blanchette R. Delignification by Wood-Decay Fungi. Vol. 29, *Annual Review of*  
417 *Phytopathology.* 2003. 381–403 p.
- 418 10. Margot J, Bennati-Granier C, Maillard J, Blanquez P, Barry DA, Holliger C. Bacterial  
419 versus fungal laccase: potential for micropollutant degradation. *AMB Express.* 2013  
420 Oct;3(1):63.
- 421 11. Jayasuriya AHM, Kitchener DJ, Biradar CM. Viability status of biosphere reserves in Sri  
422 Lanka. *J Natl Sci Found Sri Lanka.* 2011;39(4):303–19.
- 423 12. Iqbal MCM, Nalaka GDA, Kumarathunage MDP. Tree diversity in a tropical dry mixed  
424 evergreen forest plot in Sri Lanka. *Proc Int For Environ Symp.* 2012;17(August  
425 2015):2012.
- 426 13. Madurapperuma BD, Oduor PG, Kuruppuarachchi KAJM, Wijayawardene DNN,  
427 Munasinghe JU. Comparing Floristic Diversity between a Silviculturally Managed  
428 Arboretum and a Forest Reserve in Dambulla, Sri Lanka. *J Trop For Environ.*  
429 2018;3(2):11–22.
- 430 14. Upadhyay P, Shrivastava R, Agrawal PK. Bioprospecting and biotechnological  
431 applications of fungal laccase. *3 Biotech.* 2016;6(1):1–12.
- 432 15. Jeon J-R, Baldrian P, Murugesan K, Chang Y-S. Laccase-catalysed oxidations of naturally

- 433 occurring phenols: from in vivo biosynthetic pathways to green synthetic applications.  
434 Microb Biotechnol. 2012 May;5(3):318–32.
- 435 16. Rodriguez E, Pickard MA, Vazquez-Duhalt R. Industrial dye decolorization by laccases  
436 from ligninolytic fungi. Curr Microbiol. 1999 Jan;38(1):27–32.
- 437 17. Liu H, Cheng Y, Du B, Tong C, Liang S, Han S, et al. Overexpression of a novel  
438 thermostable and chloride-tolerant laccase from *Thermus thermophilus* SG0.5JP17-16 in  
439 *Pichia pastoris* and its application in synthetic dye decolorization. PLoS One.  
440 2015;10(3):e0119833.
- 441 18. Surwase S V, Patil SA, Srinivas S, Jadhav JP. Interaction of small molecules with fungal  
442 laccase: A Surface Plasmon Resonance based study. Enzyme Microb Technol. 2016  
443 Jan;82:110–4.
- 444 19. Baumgartner K, Travadon R, Bruhn J, Bergemann SE. Contrasting patterns of genetic  
445 diversity and population structure of *Armillaria mellea* sensu stricto in the eastern and  
446 western United States. Phytopathology. 2010 Jul;100(7):708–18.
- 447 20. Swe KT. Screening of potential lignin-degrading microorganisms and evaluating their  
448 optimal enzyme producing culture conditions. 2011;86.
- 449 21. Cenis JL. Rapid extraction of fungal DNA for PCR amplification. Nucleic Acids Res.  
450 1992;20(9):2380.
- 451 22. White TJ, Bruns T, Lee S, Taylor J. AMPLIFICATION AND DIRECT SEQUENCING  
452 OF FUNGAL RIBOSOMAL RNA GENES FOR PHYLOGENETICS. PCR Protoc  
453 [Internet]. 1990 Jan 1 [cited 2019 May 18];315–22. Available from:



- 454 <https://www.sciencedirect.com/science/article/pii/B9780123721808500421?via%3Dihub>
- 455 23. Maduranga K, Attanayake RN, Santhirasegaram S, Weerakoon G, Paranagama PA.  
456 Molecular phylogeny and bioprospecting of Endolichenic Fungi (ELF) inhabiting in the  
457 lichens collected from a mangrove ecosystem in Sri Lanka. PLoS One [Internet]. 2018  
458 Aug 29;13(8):e0200711. Available from: <https://doi.org/10.1371/journal.pone.0200711>
- 459 24. Hall T. BioEdit: A User-Friendly Biological Sequence Alignment Editor and Analysis  
460 Program for Windows 95/98/NT. Vol. 41, Nucleic Acids Symposium Series. 1999. 95–98  
461 p.
- 462 25. Edgar RC. MUSCLE: multiple sequence alignment with high accuracy and high  
463 throughput. Nucleic Acids Res. 2004;32(5):1792–7.
- 464 26. Kumar S, Stecher G, Li M, Knyaz C, Tamura K. MEGA X: Molecular Evolutionary  
465 Genetics Analysis across Computing Platforms. Mol Biol Evol. 2018 Jun;35(6):1547–9.
- 466 27. Talavera G, Castresana J. Improvement of phylogenies after removing divergent and  
467 ambiguously aligned blocks from protein sequence alignments. Syst Biol. 2007  
468 Aug;56(4):564–77.
- 469 28. Arora DS, Sandhu DK. Decomposition of angiospermic wood sawdust and laccase  
470 production by two Pleurotus species. J Basic Microbiol [Internet]. 1987 Jan 1;27(4):179–  
471 84. Available from: <https://doi.org/10.1002/jobm.3620270402>
- 472 29. Jonathan SG, Fasidi IO. Effect of carbon, nitrogen and mineral sources on growth of  
473 Psathyrella atroumbonata (Pegler), a Nigerian edible mushroom. Food Chem [Internet].  
474 2001;72(4):479–83. Available from:

- 475 <http://www.sciencedirect.com/science/article/pii/S030881460000265X>
- 476 30. Nidadavolu SVSSSLHB, Gudikandula K, Pabba SK, Maringanti SC. Decolorization of  
477 triphenyl methane dyes by *Fomitopsis feei*; Nat Sci. 2013;05(06):30–5.
- 478 31. Lopez C, Moreira MT, Feijoo G, Lema JM. Dye decolorization by manganese peroxidase  
479 in an enzymatic membrane bioreactor. Biotechnol Prog. 2004;20(1):74–81.
- 480 32. Ediriweera SS, Wijesundera RLC, Weerasena OVDSJ. Macrofungi from the Sigiriya  
481 wilderness in Sri Lanka. 2014;52(1):47–51.
- 482 33. Nishida, T.; Kashino, Y.; Mimura, A.; Takahara Y. Lignin biodegradation by wood-  
483 rotting fungi I. Screening of lignin-degrading fungi. Mokuzaï Gakkaishi J Japan Wood  
484 Res Soc [Internet]. 1988 Jan 1;34(6):530–6. Available from:  
485 <https://eurekamag.com/research/001/628/001628736.php>
- 486 34. Luterek J, Gianfreda L, Wojtaś-Wasilewska M, Rogalski J, Jaszek M, Malarczyk E, et al.  
487 Screening of the wood-rotting fungi for laccase production: Induction by ferulic acid,  
488 partial purification, and immobilization of laccase from the high laccase-producing strain,  
489 *Cerrena unicolor*. Vol. 46, Acta Microbiologica Polonica. 1997. 297–311 p.
- 490 35. Ben Younes S, Mechichi T, Sayadi S. Purification and characterization of the laccase  
491 secreted by the white rot fungus *Perenniporia tephropora* and its role in the  
492 decolourization of synthetic dyes. J Appl Microbiol. 2007 Apr;102(4):1033–42.
- 493 36. Hori C, Gaskell J, Igarashi K, Samejima M, Hibbett D, Henrissat B, et al. Genomewide  
494 analysis of polysaccharides degrading enzymes in 11 white- and brown-rot Polyporales  
495 provides insight into mechanisms of wood decay. Mycologia [Internet]. 2013 Nov

- 496 1;105(6):1412–27. Available from: <https://doi.org/10.3852/13-072>
- 497 37. Abd El Monssef RA, Hassan EA, Ramadan EM. Production of laccase enzyme for their  
498 potential application to decolorize fungal pigments on aging paper and parchment. *Ann*  
499 *Agric Sci* [Internet]. 2016;61(1):145–54. Available from:  
500 <http://www.sciencedirect.com/science/article/pii/S057017831500055X>
- 501 38. Ratanapongleka K, Phetsom J. Decolorization of Synthetic Dyes by Crude Laccase from  
502 *Lentinus Polychrous* Lev. Vol. 5, *International Journal of Chemical Engineering and*  
503 *Applications*. 2014. 26–30 p.
- 504 39. Qin X, Zhang J, Zhang X, Yang Y. Induction, purification and characterization of a novel  
505 manganese peroxidase from *Irpex lacteus* CD2 and its application in the decolorization of  
506 different types of dye. *PLoS One*. 2014;9(11):e113282.
- 507 40. S T, V P, Ingale S, A G. UTILIZATION OF LIGNOCELLULOSES FOR THE  
508 PRODUCTION OF LIGNINOLYTIC ENZYMES BY WHITE ROT BASIDIOMYCETE  
509 *CORIOLOPSIS CAPERATA* AGST2. Vol. 2, *International Journal of Biotechnology and*  
510 *Biosciences*. 2012. 228–238 p.
- 511 41. Nandal P, Ravella SR, Kuhad RC. Laccase production by *Coriolopsis caperata* RCK2011:  
512 optimization under solid state fermentation by Taguchi DOE methodology. *Sci Rep*.  
513 2013;3:1386.
- 514 42. Forootanfar H, Moezzi A, Aghaie-Khozani M, Mahmoudjanlou Y, Ameri A, Niknejad F,  
515 et al. Synthetic dye decolorization by three sources of fungal laccase. *Iranian J Environ*  
516 *Health Sci Eng* [Internet]. 2012 Dec 15;9(1):27. Available from:  
517 <https://www.ncbi.nlm.nih.gov/pubmed/23369690>

518 43. Cázares-García SV, Vázquez-Garcidueñas S, Vázquez-Marrufó G. Structural and  
519 phylogenetic analysis of laccases from Trichoderma: a bioinformatic approach. PLoS One  
520 [Internet]. 2013 Jan 31;8(1):e55295–e55295. Available from:  
521 <https://www.ncbi.nlm.nih.gov/pubmed/23383142>

522

523

524

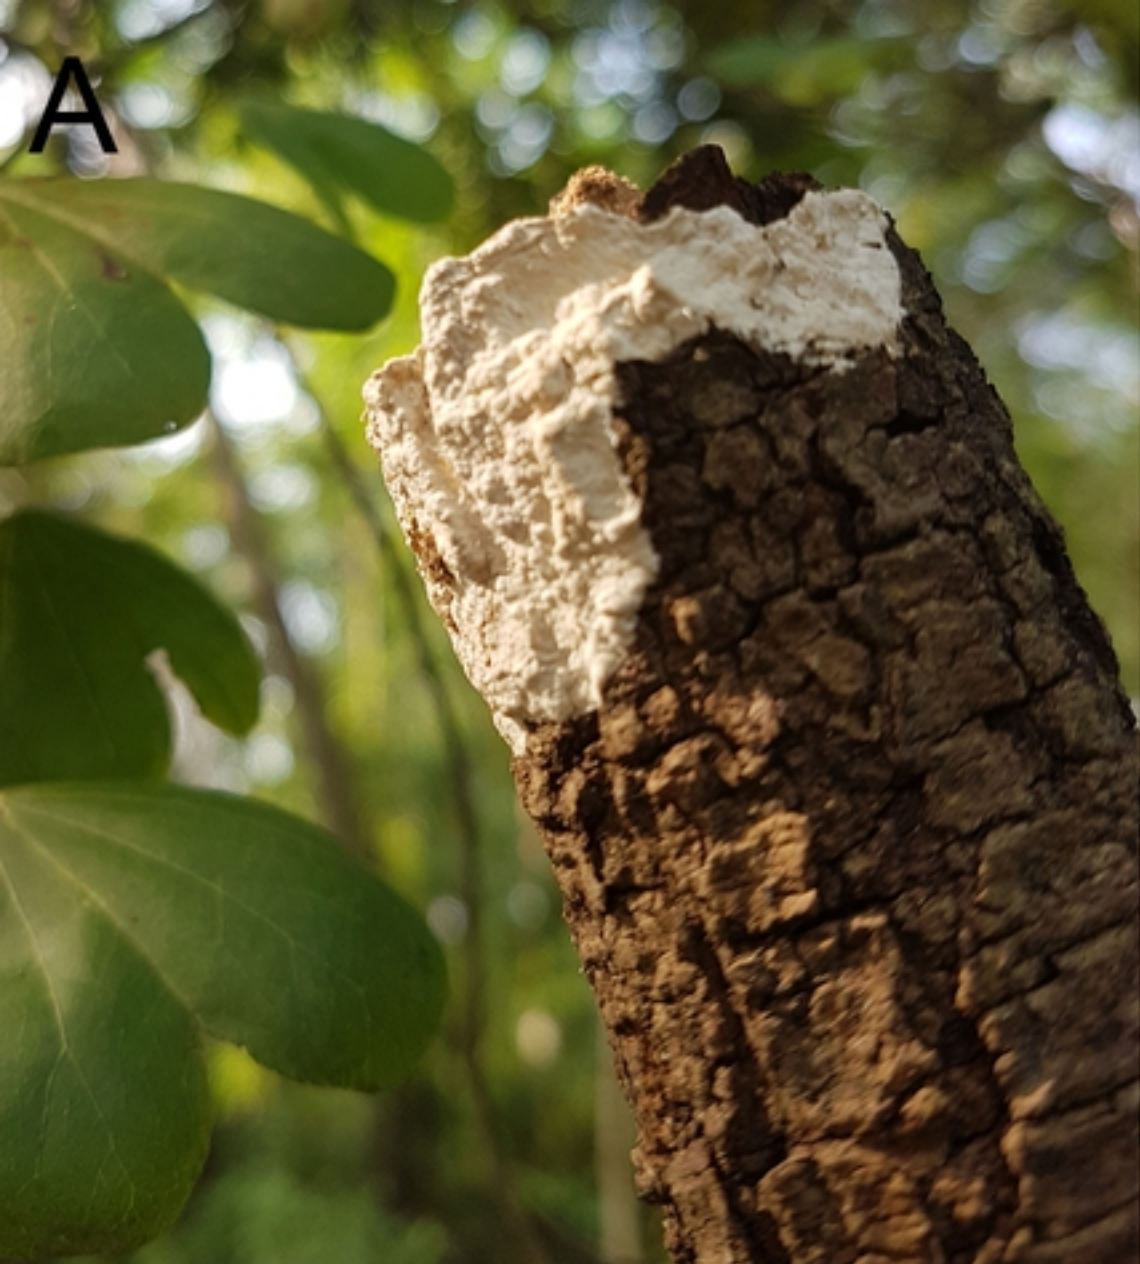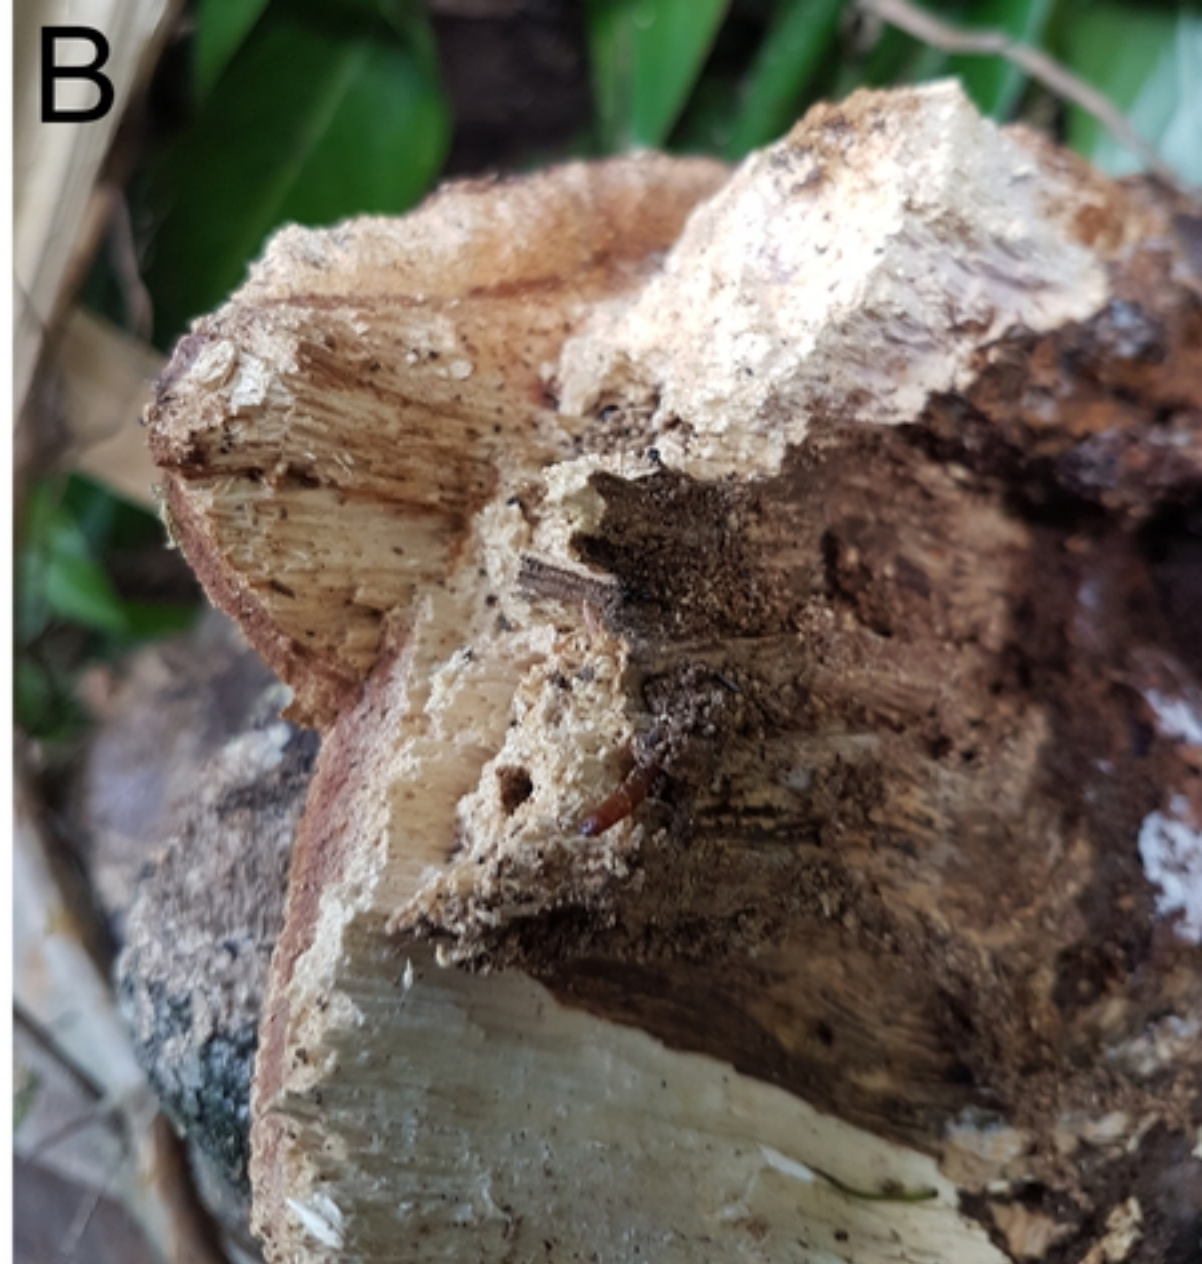

Fig 1

Colony diameter (cm)

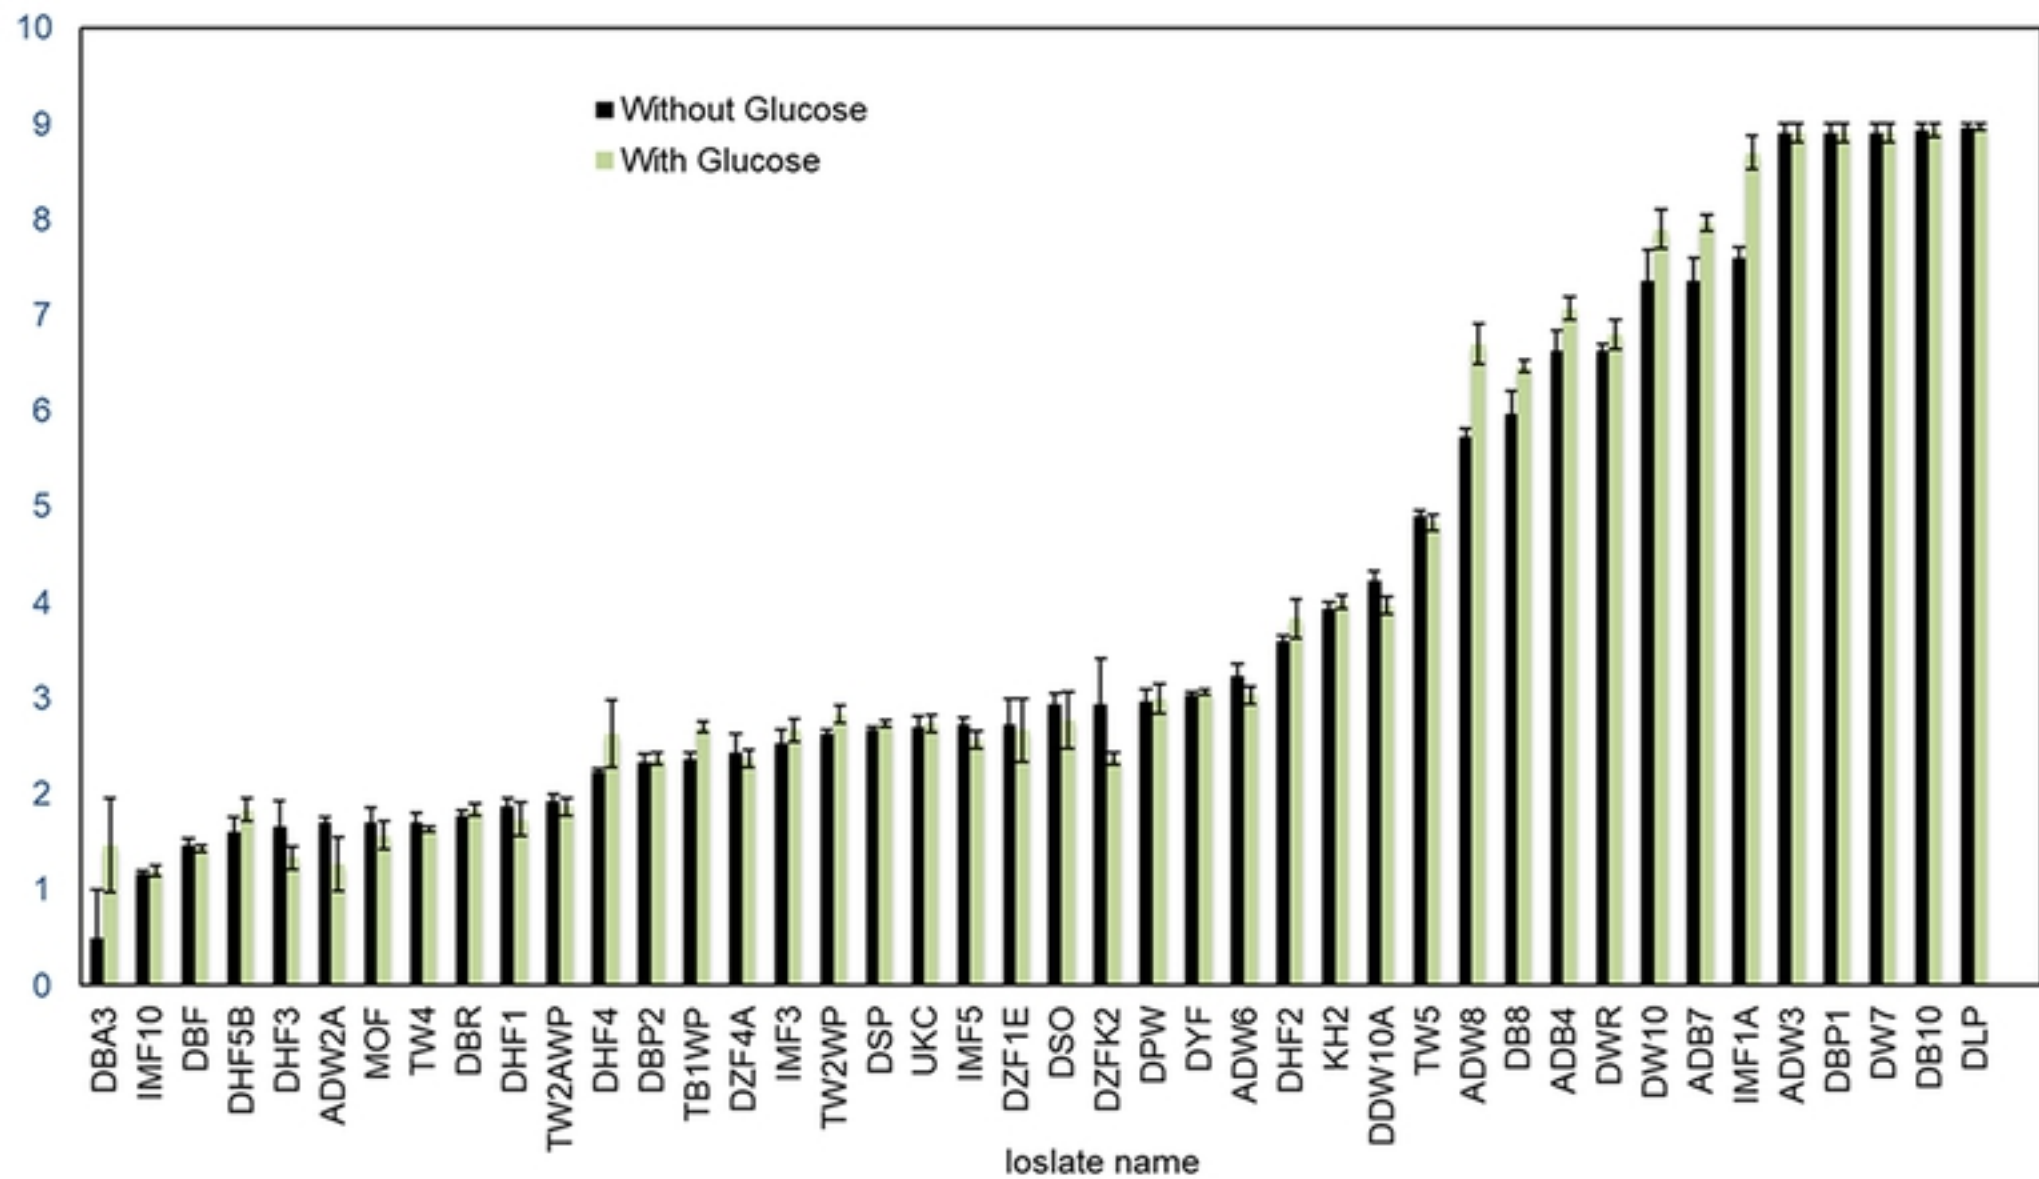

Fig 2

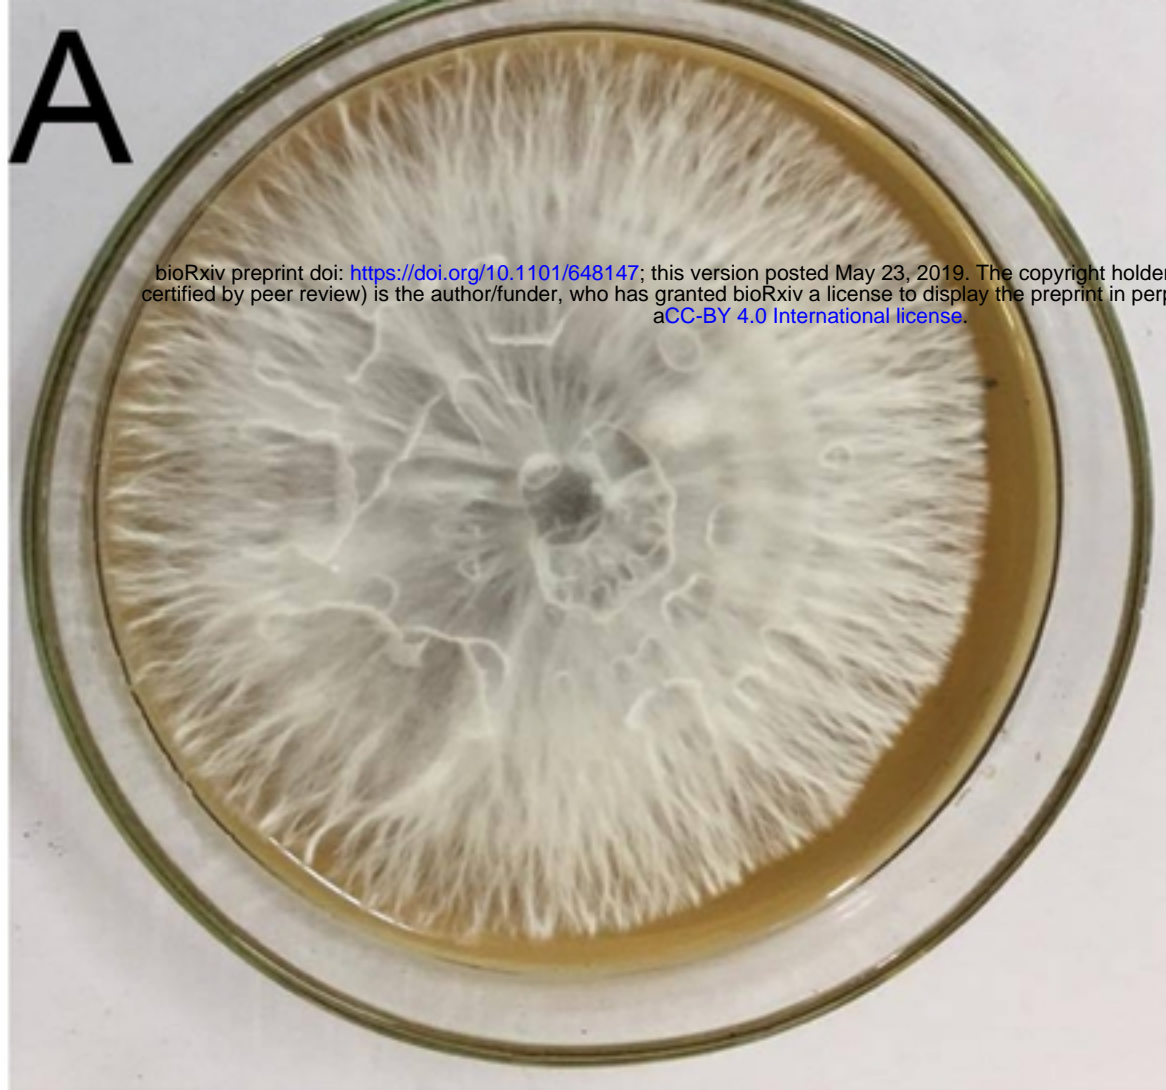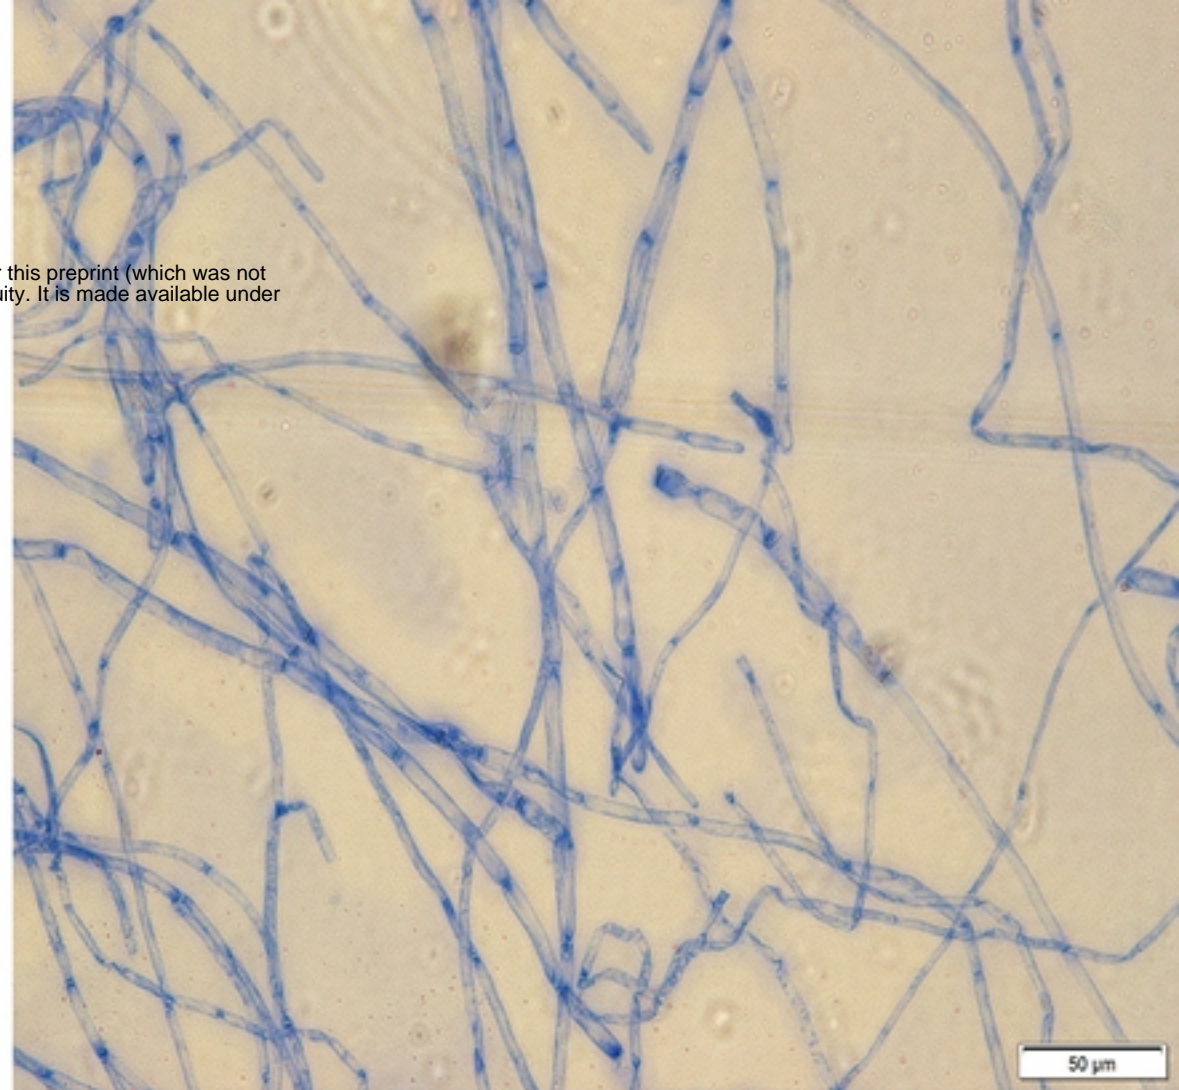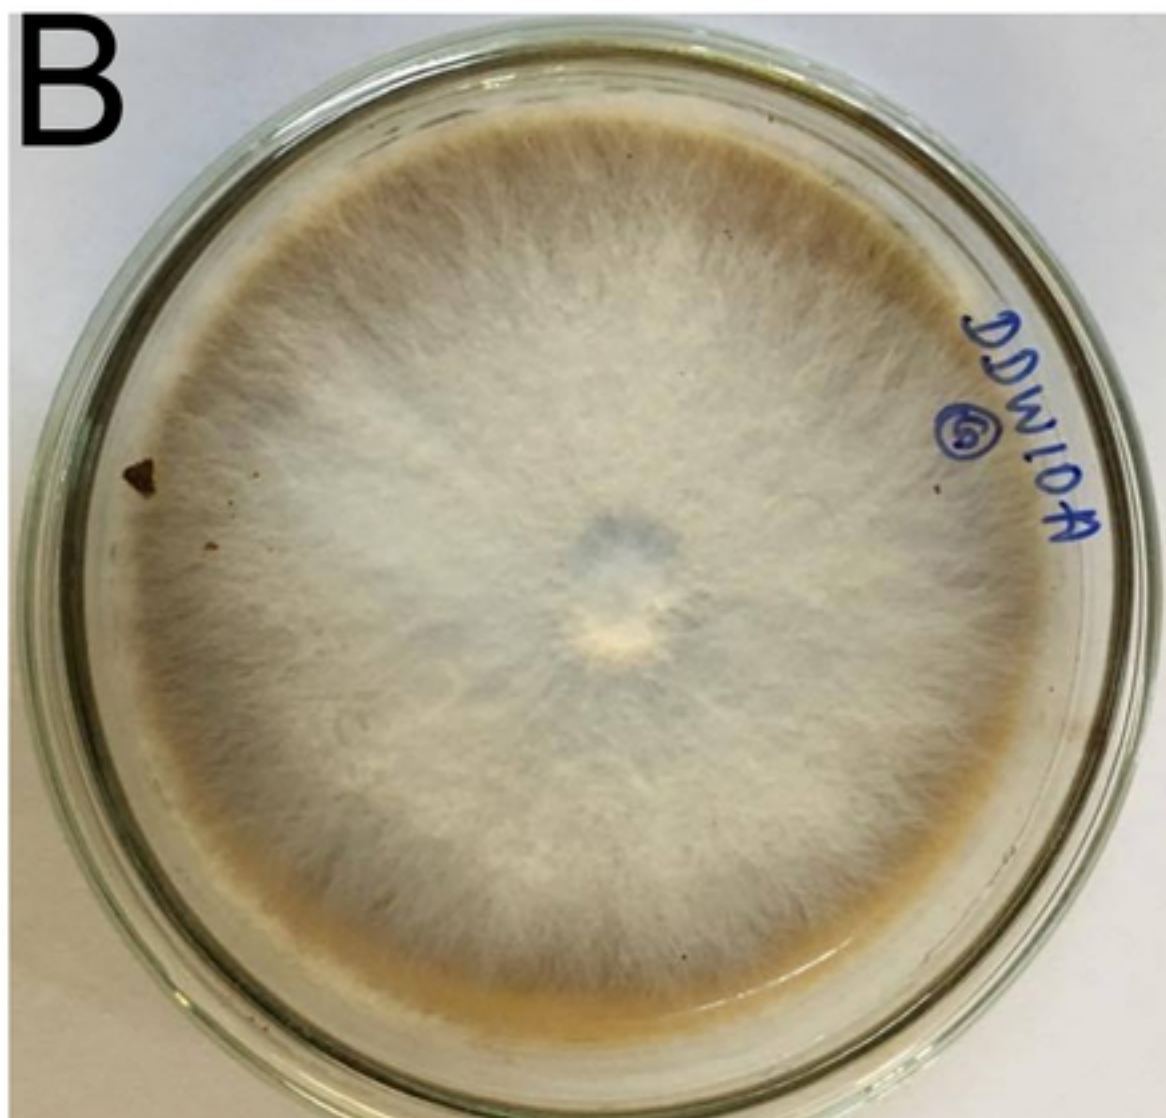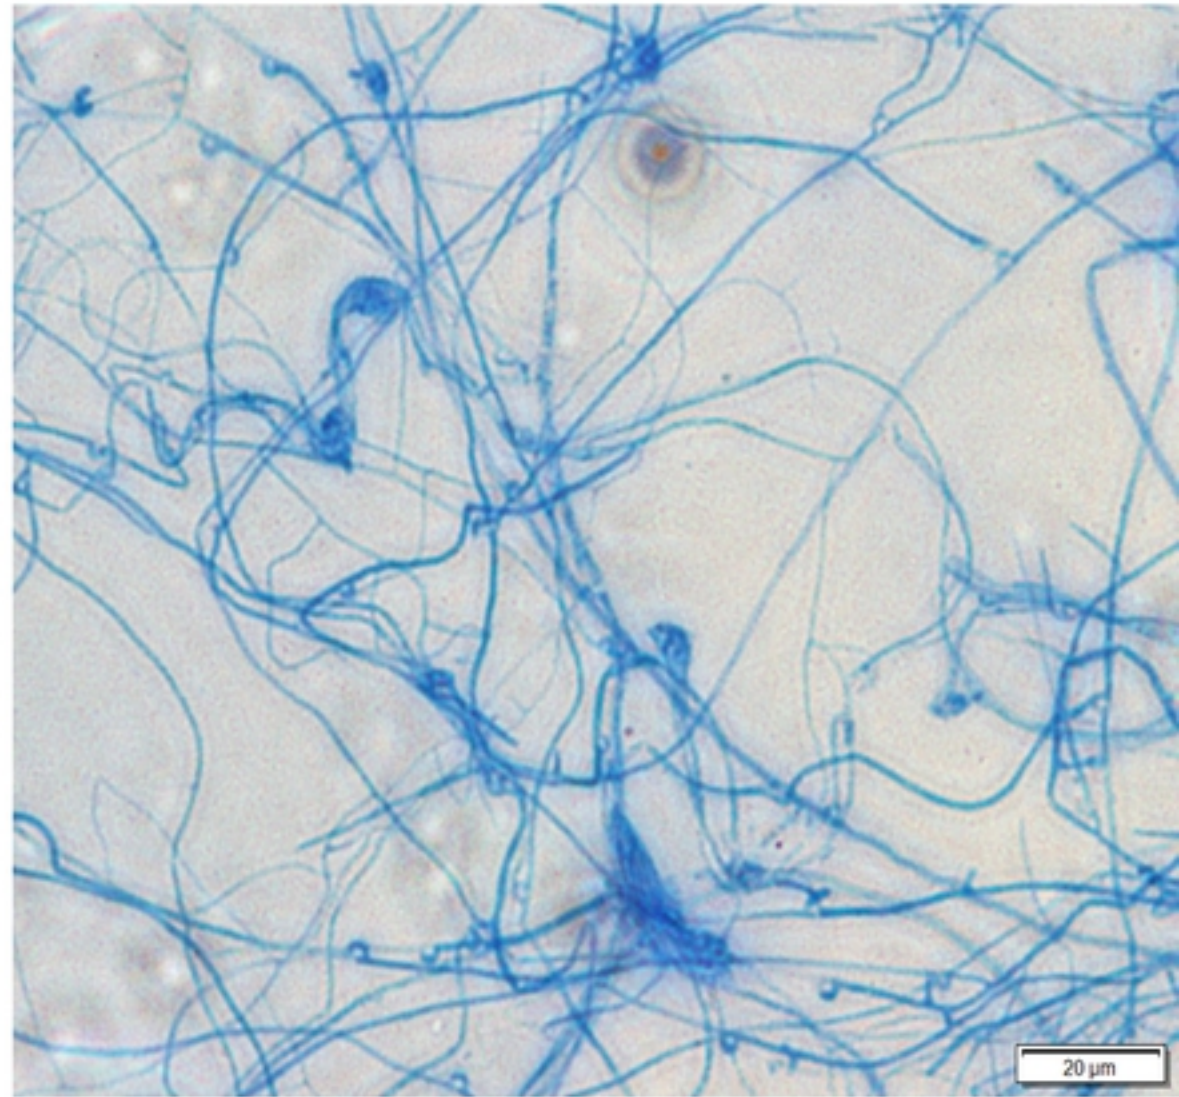

**Fig 3**

bioRxiv preprint doi: <https://doi.org/10.1101/648147>; this version posted May 23, 2019. The copyright holder for this preprint (which was not certified by peer review) is the author/funder, who has granted bioRxiv a license to display the preprint in perpetuity. It is made available under aCC-BY 4.0 International license.

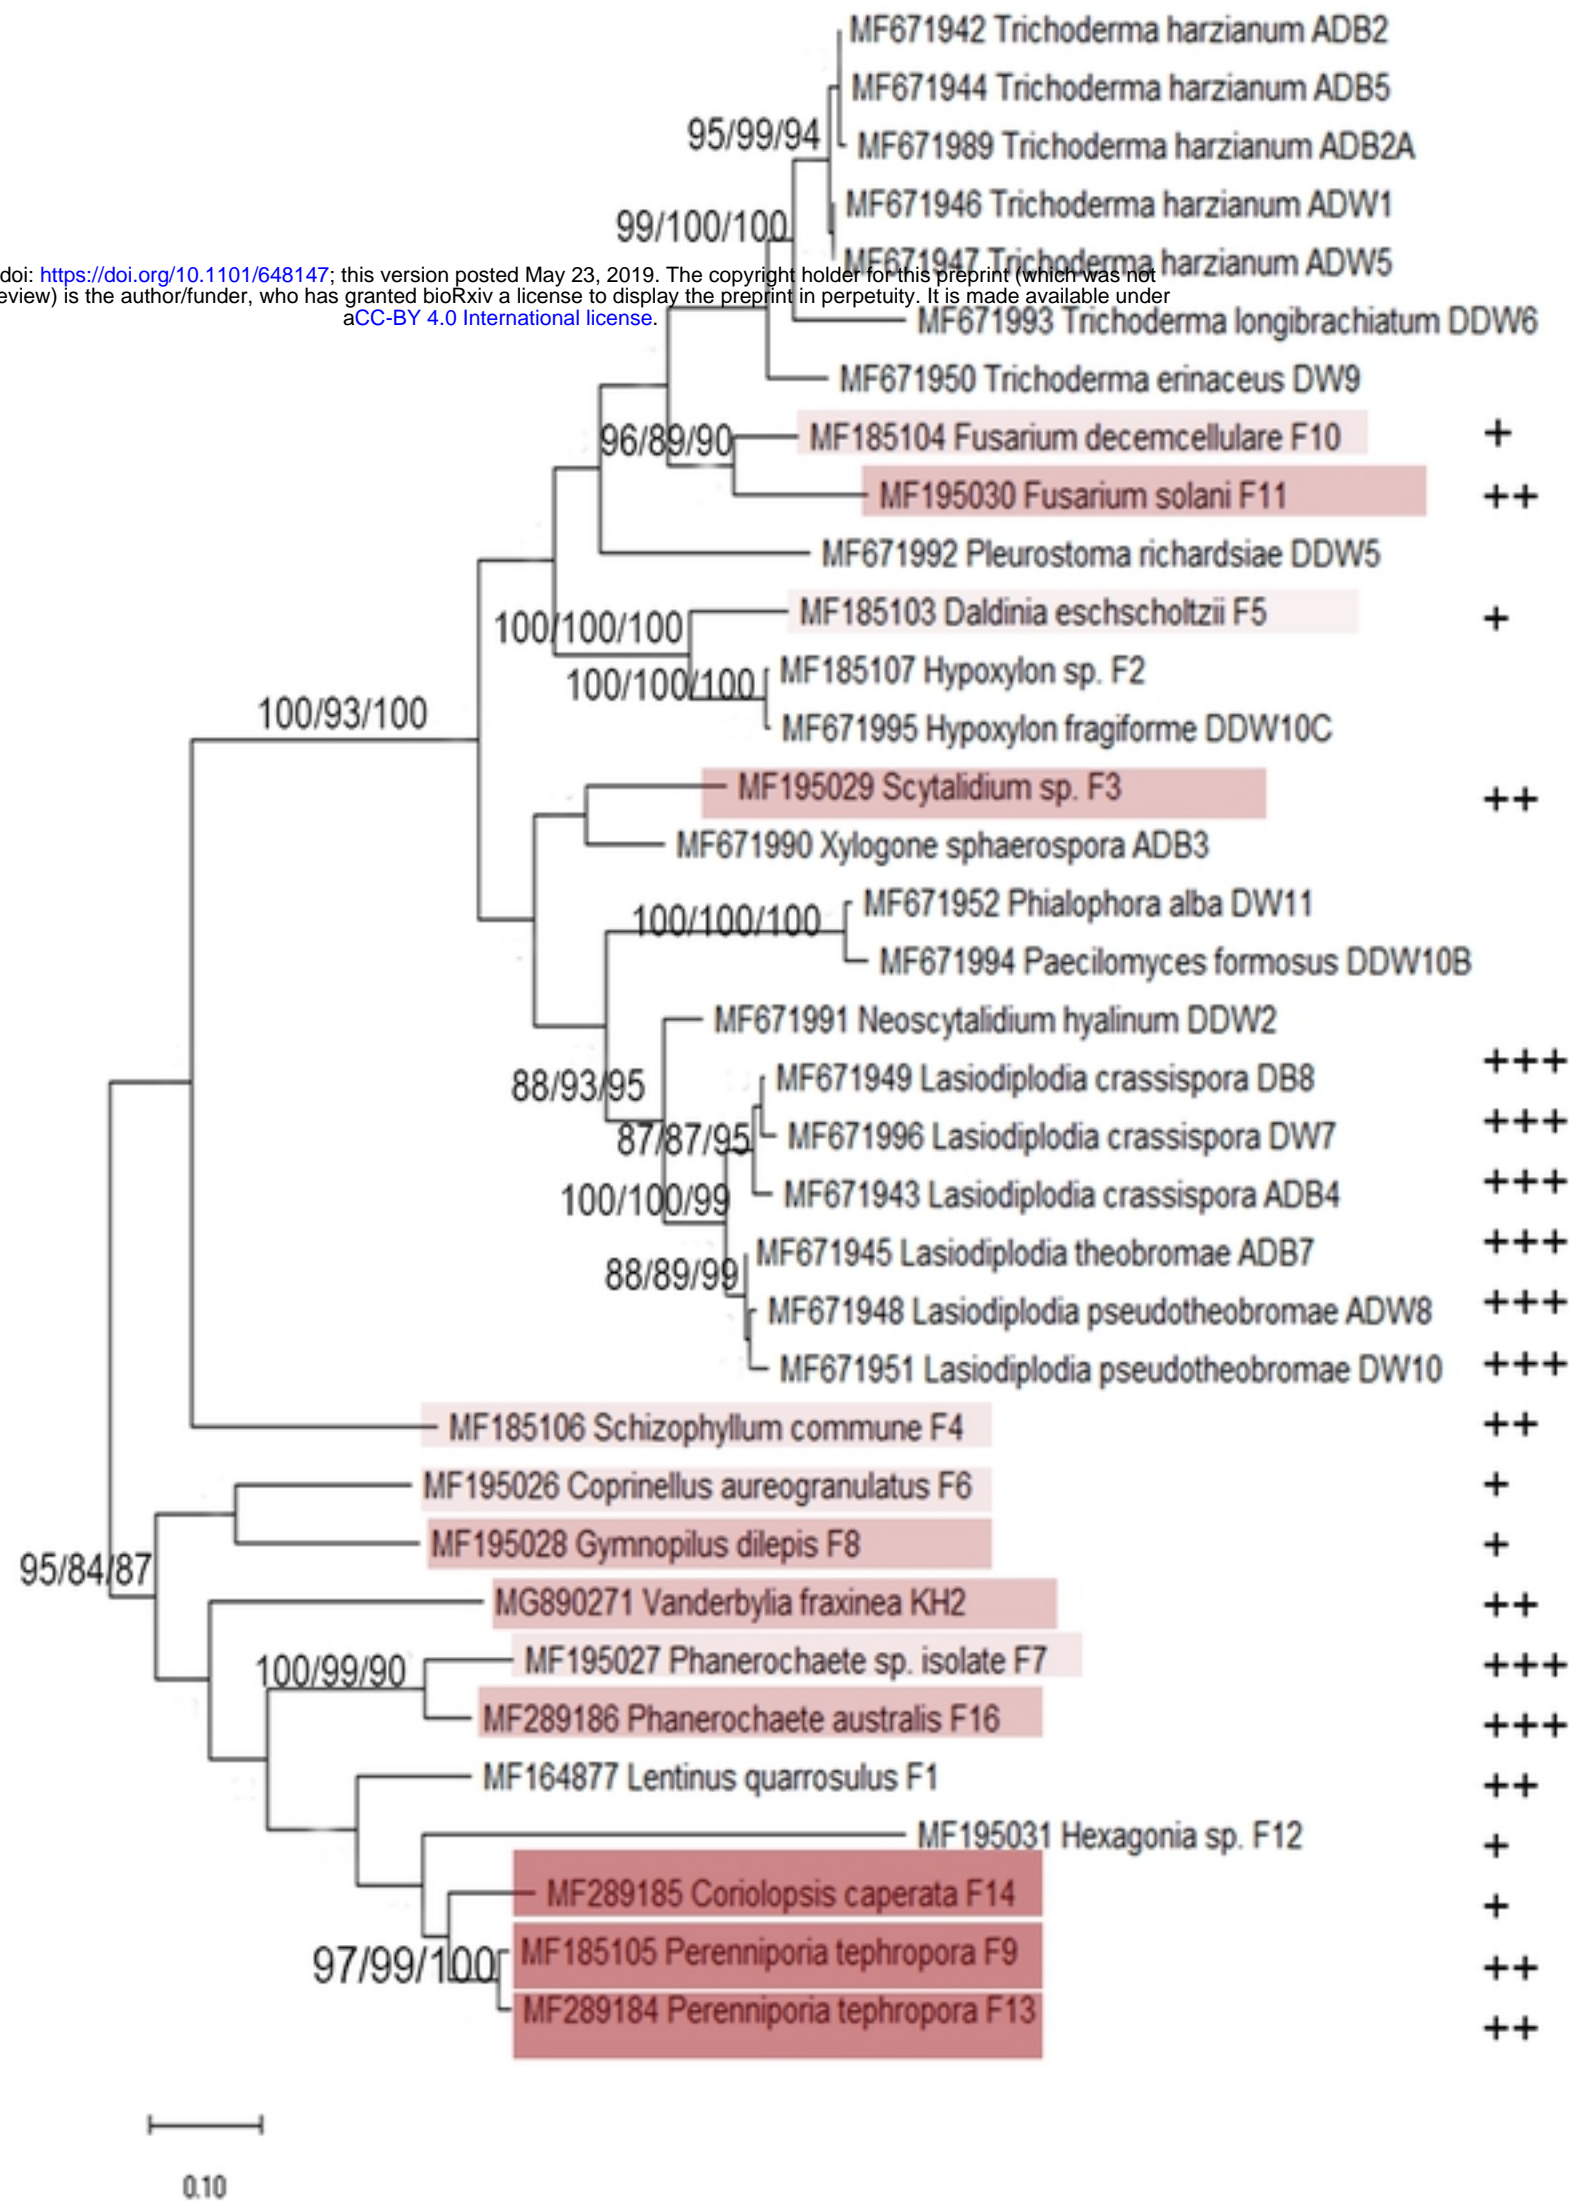

Fig 4
